# Supplementary material
Source: ML conference proceedings conference paper supplement (https://openaccess.thecvf.com/content/ICCV2021/html/Reed_Dynamic_CT_Reconstruction_ICCV_2021_paper.html)
Supplement: Supplementary file 1 [file Reed_Dynamic_CT_Reconstruction_ICCV_2021_supplemental.zip]

Archive with 6 entries (6 files):
- 06317-supp/06317-supp.pdf
- 06317-supp/alum1.mp4
- 06317-supp/alum2.mp4
- 06317-supp/dynamic_frame_rate.mp4
- 06317-supp/heart_upsampled.mp4
- 06317-supp/thoracic.mp4
